# Supplementary material for: Atrial fibrillation and psychological factors: a systematic review
Source: PeerJ. 2017 Aug 11;5:e3537. doi: 10.7717/peerj.3537 (PMC5555290; doi:10.7717/peerj.3537)
Supplement: Supplemental Information 1 — The effect size computations performed using Cohen’s d. [file peerj-05-3537-s001.xlsx]

## Sheet: Foglio1
	Title	Authors	Years	ASSESSMENT	N. total sample	N. FA	MEAN FA	SD FA	CONTROL TYPE	N. CONTROL	MEAN CONTROLLO	SD CONTROLLO	(nfa-1)S^2	(ncont-1)S^2	n.camp-2	T+U/V	Spooled	d	n camp/ nfa*ncontr	D^2	2*ncamp	D^2/2*ncamp	Var d	SE d		OR	logOR	SE OR	SE log OR	Vlog OR	SE log OR
	The relationship between personality, socio-economic factors, acute life stress and the development, spontanous conversion and recurrences of acute lone atrial fibrillation	Mattioli et al.,	2005	Life Changes Scaling (LCU)	232	116	56	33	healty controll	116	34	27	125235	83835	230	909	30.1496	0.729694	0.0172414	0.532453	464	0.00114753	0.0183889	0.135606
			2005	Type A personality	232	116	9	1.07	healty controll	116	5.5	2	131.663	460	230	2.57245	1.60389	2.1822	0.0172414	4.762	464	0.0102629	0.0275043	0.165844
	Depression, anxiety, and quality of life in patients with atrial fibrillation	Thrall et al.,	2007	BDI (depression)	198	101	38	37.6	Hypertensive	97	29	30	141376	86400	196	1162.12	34.0899	0.264008	0.0202103	0.0697001	396	0.00017601	0.0203863	0.142781
			2007	STAI (anxiety trait)	198	101	37.4	12.6	Hypertensive	97	33.3	11.4	15876	12476.2	196	144.654	12.0272	0.340894	0.0202103	0.116208	396	0.000293456	0.0205037	0.143191
	Quality of life and depression in patients with different patterns of atrial fibrillation	Dąbrowski et al.,	2010	BDI (depression)	220	150				70								0.382346					0.102065	0.319477		2	0.693147			0.335114	0.57889
	Quality of life in elderly inpatients with atrial fibrillation as compared with controlled subjects	Perret-Guillaume et al.,	2010	DUKE (depression)	164	41	50.2	5.1	healty controll	123	62.4	3.5	1040.4	1494.5	162	15.6475	3.9557	-3.08416	0.0325203	9.51204	328	0.0290001	0.0615205	0.248033
				DUKE (anxiety)	164	41	58.5	3.4	healty controll	123	65.9	2.8	462.4	956.48	162	8.75852	2.95948	-2.50044	0.0325203	6.2522	328	0.0190616	0.0515819	0.227117
				SF-36 (mental health)	164	41	55.9	3.7	healty controll	123	57.7	3.1	547.6	1172.42	162	10.6174	3.25844	-0.552412	0.0325203	0.305159	328	0.000930364	0.0334507	0.182895
	Depression in atrial fibrillation in the general population.	Schnabel et al.,	2013	History of depression	9989	309				9680								0.0373211					0.0076312	0.0873568		1.07	0.0676586			0.0250558	0.15829
				Caseness Depression (PHQ > 10)														-0.229202					0.0184306	0.135759		0.66	-0.415515			0.0605137	0.245995
	Differences in quality of life, anxiety, depression in patients with paroxysmal atrial fibrillation and common forms of atrioventricular reentry supraventricular tachycardias.	Lioni et al.,	2014	BDI (depression)	106	54	10.7	7.55	SVTs	52	8.15	7.15	3021.13	2607.25	104	54.119	7.35656	0.346629	0.0377493	0.120152	212	0.000566754	0.038316	0.195745
				STAI (anxiety trait)	106	54	42.18	9.45	SVTs	52	38.28	9.73	4733.03	4828.32	104	91.9361	9.58833	0.406744	0.0377493	0.165441	212	0.000780382	0.0385297	0.19629
				STAI (anxiety state)	106	54	45.53	10.25	SVTs	52	37.96	9.27	5568.31	4382.58	104	95.6816	9.7817	0.773894	0.0377493	0.598912	212	0.00282506	0.0405743	0.201431
	Long-term risk of atrial fibrillation after death of a partner.	Graff et al.,	2016	Baravement and developing of AF	974732	88612				886120								0.189527					0.0295127	0.171793		1.41	0.34359			0.0969	0.311288
	Global Psychological Distress and Risk of Atrial Fibrillation Among Women: The Women’s Health Study	Whang et al.,	2012	MHI5 score < 53	30746	771				29975								-0.118773					0.00692646	0.0832253		0.806282	-0.215322			0.0227419	0.150804
